# Supplementary material for: Efficacy of Jackfruit365™ Green Jackfruit Flour Fortified Diet on Pegfilgrastim to Prevent Chemotherapy-Induced Leukopenia, Irrespective of Tumor Type or Drugs Used—A Retrospective Study
Source: MDPI journal article supplement (doi:10.3390/biom10020218), 2020-02-02
Supplement: s1 [file s1]

**Table S1: Baseline Table Which Include Tumor Type between Study and Control Group Patients**

| <b>TUMOR TYPE</b>                               | <b>STUDY GROUP</b> | <b>CONTROL GROUP</b> |
|-------------------------------------------------|--------------------|----------------------|
| Breast Cancer                                   | 20                 | 20                   |
| Ovary Cancer                                    | 6                  | 5                    |
| Tongue Cancer                                   | 5                  | 3                    |
| Lung Cancer                                     | 3                  | 3                    |
| Rectum Cancer                                   | 2                  | 1                    |
| Endometrium Cancer                              | 2                  | 1                    |
| Pancreas Cancer                                 | 3                  | 1                    |
| Oesophagus junction Cancer                      | 1                  | 1                    |
| Gastro- Oesophagus Cancer                       | 2                  | 0                    |
| Ileocecal Junction Cancer                       | 1                  | 0                    |
| Urethra Cancer                                  | 1                  | 0                    |
| Buccal Mucosa                                   | 1                  | 0                    |
| Kidney Nephrectomy Cancer                       | 1                  | 0                    |
| Sarcomatoid Cancer                              | 1                  | 0                    |
| Soft Tissue sarcoma of Left Pelvic              | 1                  | 0                    |
| Leiomyosarcoma uterus                           | 0                  | 3                    |
| Olfactory Neuroblastoma                         | 0                  | 1                    |
| Soft tissue Sarcoma of rt. Upper limb           | 0                  | 1                    |
| Stomach Cancer                                  | 0                  | 3                    |
| Soft tissue Sarcoma of Thigh                    | 0                  | 1                    |
| Soft tissue Sarcoma of left thigh posteromedial | 0                  | 1                    |
| Squamoua Cell Ca of right leg                   | 0                  | 1                    |

**Table S2: Baseline Table of Drug Type between Study and Control Group Patients**

| <b>DRUG TYPE</b>         | <b>STUDY GROUP</b> | <b>CONTROL GROUP</b> |
|--------------------------|--------------------|----------------------|
| Albumin Bound Paclitaxel | 32                 | 35                   |
| Carboplatin              | 18                 | 16                   |
| Liposomal Doxorubicin    | 11                 | 14                   |
| Oxaliplatin              | 9                  | 8                    |
| Herceptin or Biosimilar  | 11                 | 5                    |
| Solvent free Docetaxel   | 10                 | 5                    |
| Bevazizumab              | 6                  | 8                    |
| Nimotuzumab              | 7                  | 2                    |
| Holoxan                  | 4                  | 3                    |
| Epirubicin               | 2                  | 4                    |

Table S3: Analytical Report for Amino Acid Profile and Potassium

## ANALYTICAL REPORT

|                           |                                                                                                            |                              |                         |
|---------------------------|------------------------------------------------------------------------------------------------------------|------------------------------|-------------------------|
| <b>Sample code:</b>       | 260-2019-08000117                                                                                          | <b>Received on:</b>          | 02.08.2019              |
| <b>Sample name:</b>       | Jack Fruit 365 Jack of Fibr                                                                                | <b>Analysed between:</b>     | 02.08.2019 - 16.08.2019 |
| <b>Sample reference:</b>  | Green Jackfruit Flour<br>Batch number: IPA8G1011<br>Mfg. date: 03/2019<br>Best before: 12 months from mfg. |                              |                         |
| <b>Sample appearance:</b> | Black colour powder                                                                                        |                              |                         |
| <b>Quantity received:</b> | 200 g                                                                                                      | <b>Condition on receipt:</b> | Good                    |
| <b>Sample packing:</b>    | Trade pack                                                                                                 | <b>Sampling:</b>             | NOT SAMPLED BY EUROFINS |

| MINERALS                | Method       | Result Unit   |
|-------------------------|--------------|---------------|
| IR093 IR *Sodium (Na)   | AOAC 2011.14 | <0.2 mg/100 g |
| IR094 IR *Potassium (K) | AOAC 2011.14 | 1470 mg/100 g |

| CHEMICAL                                                 | Method                               | Result Unit   |
|----------------------------------------------------------|--------------------------------------|---------------|
| IR938 IR *Ferulic acid                                   | Polish J Food and Nutrition Sciences | 9.13 mg/kg    |
| IR939 IR *p-Coumaric acid                                | Polish J Food and Nutrition Sciences | 0.15 mg/kg    |
| IR0U9 IR *Polyphenols calculated as catechine equivalent | By Customer Protocol                 | <0.01 g/100 g |
| IR25G IR *Gallic acid                                    | ISO 14502-2:2005                     | 1.23 mg/kg    |

| AMINO-ACID PROFILE                                   | Result Unit  |
|------------------------------------------------------|--------------|
| IR130 IR Amino Acids Method: EASI-CHE-SOP-25, LC-FLD |              |
| * Threonine                                          | 0.18 g/100 g |
| * Tyrosine                                           | 0.29 g/100 g |
| * Valine                                             | 0.44 g/100 g |
| * Proline                                            | 0.39 g/100 g |
| * Serine                                             | 0.47 g/100 g |
| * Methionine                                         | 0.08 g/100 g |
| * Aspartic Acid                                      | 1.27 g/100 g |
| * Cystein +Cystine                                   | 0.05 g/100 g |
| * Arginine                                           | 0.50 g/100 g |
| * Histidine                                          | 0.15 g/100 g |
| * Lysine                                             | 0.35 g/100 g |
| * Phenylalanine                                      | 0.43 g/100 g |

The results may not be reproduced except in full, without a written approval of the laboratory. The results relate only to the sample analysed.

### Eurofins Analytical Services India Private Limited

Plot no 157, First Floor, Udyog Vihar, Phase 1, Gurugram -122016, Haryana, India  
Phone: 124 625 0300, Email: delhifood@eurofins.com, website: www.eurofins.in, CIN: U73100KA2009PTC049992

Redg. Office: #540/1, Doddanakundi Industrial Area 2, Hoodi, Whitefield, Bengaluru-560048, Karnataka, India, Phone: +91 80 30982500

Page 2/2

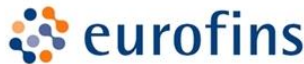

Report code: AR-19-KV-005098-01

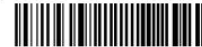

Batch code: EUINDE-00007122

| AMINO-ACID PROFILE                                   | Result Unit  |
|------------------------------------------------------|--------------|
| IR130 IR Amino Acids Method: EASI-CHE-SOP-25, LC-FLD |              |
| * Leucine                                            | 0.69 g/100 g |
| * Isoleucine                                         | 0.37 g/100 g |
| * Alanine                                            | 0.28 g/100 g |
| * Glycine                                            | 0.81 g/100 g |
| * Glutamic acid                                      | 0.75 g/100 g |
